# Supplementary material for: Hydrothermal synthesis of nitrogen and boron doped carbon quantum dots with yellow-green emission for sensing Cr(vi), anti-counterfeiting and cell imaging
Source: Royal Society of Chemistry journal article supplement (doi:10.1039/c7ra09785a), 2017-01-01
Supplement: c7ra09785a1.pdf [file c7ra09785a1.pdf]

# **Hydrothermal synthesis of nitrogen and boron doped carbon quantum dots with yellow-green emission for sensing Cr(VI), anti-counterfeiting and cell imaging**

Yongming Guo,<sup>a,\*</sup> Yuzhi Chen,<sup>b</sup> Fengpu Cao,<sup>a</sup> Lijuan Wang,<sup>a</sup> Zhuo Wang<sup>b,\*</sup> and  
Yumin Leng<sup>c</sup>

<sup>a</sup>Key Laboratory of Ecological Security for Water Source Region of Mid-line of South-to-North Diversion Project of Henan Province, Collaborative Innovation Center of Water Security for Water Source Region of Mid-line of South-to-North Diversion Project of Henan Province, Engineering Technology Research Center of Henan Province for Solar Catalysis, College of Chemistry and Pharmaceutical Engineering, Nanyang Normal University, Nanyang 473061, China

<sup>b</sup>College of Science, State Key Laboratory of Chemical Resource Engineering, Beijing Advanced Innovation Center for Soft Matter Science and Engineering, Beijing University of Chemical Technology, Beijing, 100029, China

<sup>c</sup>College of Physics and Electronic Engineering, Nanyang Normal University, Nanyang 473061, China

\*Corresponding author: E-mail: chinahenangm@163.com (Yongming Guo); wangzhuo77@mail.buct.edu.cn (Zhuo Wang)

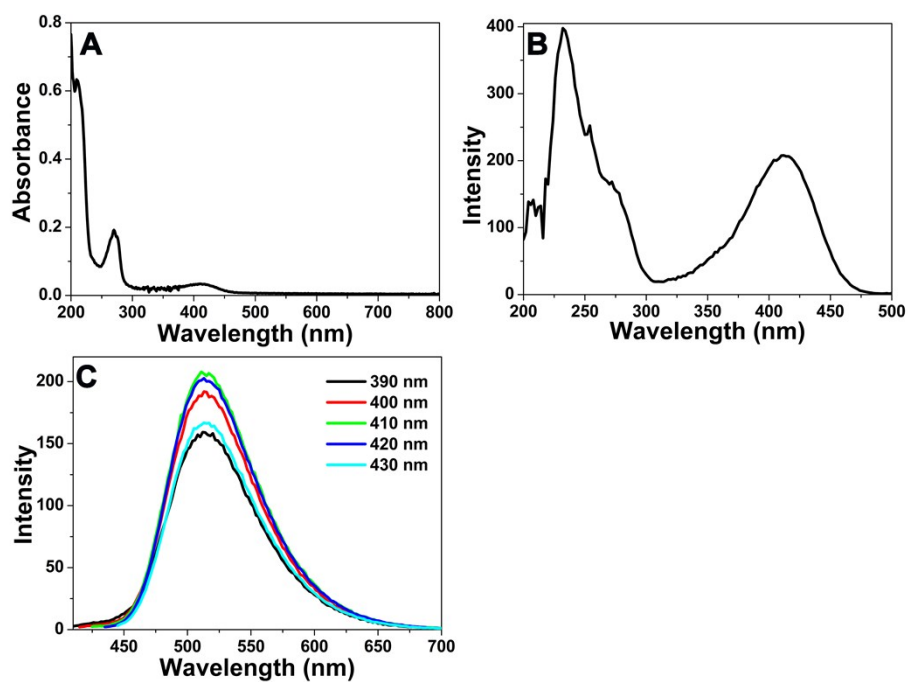

**Fig. S1** (A) UV-vis absorption spectrum of NB-CQDs prepared from 2-HPBA and EDA with 1:1. (B) Excitation spectrum of NB-CQDs prepared from 2-HPBA and EDA with 1:1. (C) Emission spectra of NB-CQDs prepared from 2-HPBA and EDA with 1:1 at different excitation wavelengths.

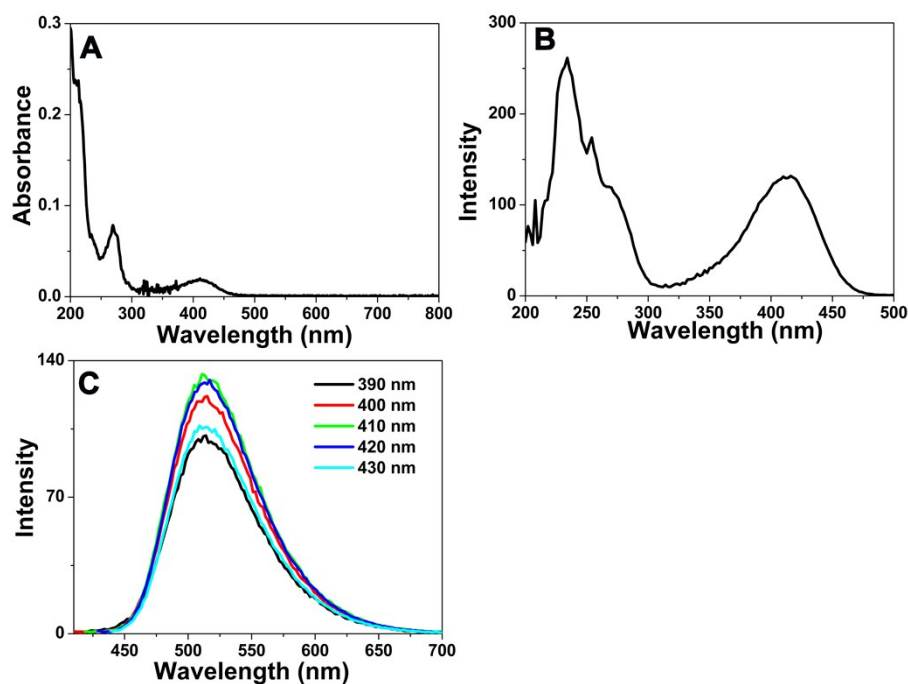

**Fig. S2** (A) UV-vis absorption spectrum of NB-CQDs prepared from 2-HPBA and EDA with 1:2. (B) Excitation spectrum of NB-CQDs prepared from 2-HPBA and EDA with 1:2. (C) Emission spectra of NB-CQDs prepared from 2-HPBA and EDA with 1:2 at different excitation wavelengths.

EDA with 1:2. (C) Emission spectra of NB-CQDs prepared from 2-HPBA and EDA with 1:2 at different excitation wavelengths.

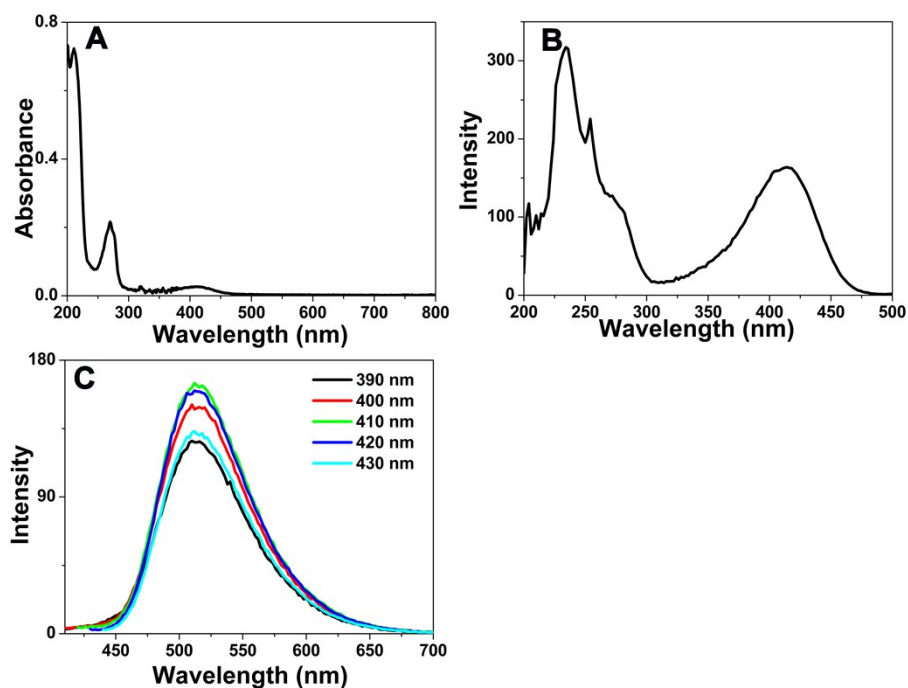

**Fig. S3** (A) UV-vis absorption spectrum of NB-CQDs prepared from 2-HPBA and EDA with 2:1. (B) Excitation spectrum of NB-CQDs prepared from 2-HPBA and EDA with 2:1. (C) Emission spectra of NB-CQDs prepared from 2-HPBA and EDA with 2:1 at different excitation wavelengths.

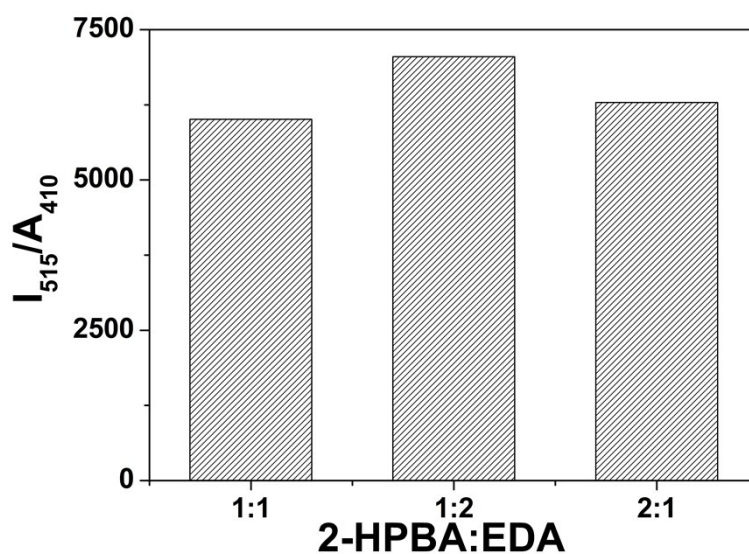

**Fig. S4** Comparison of the  $I_{515}/A_{410}$  of NB-CQDs prepared from different ratios of 2-

HPBA and EDA.

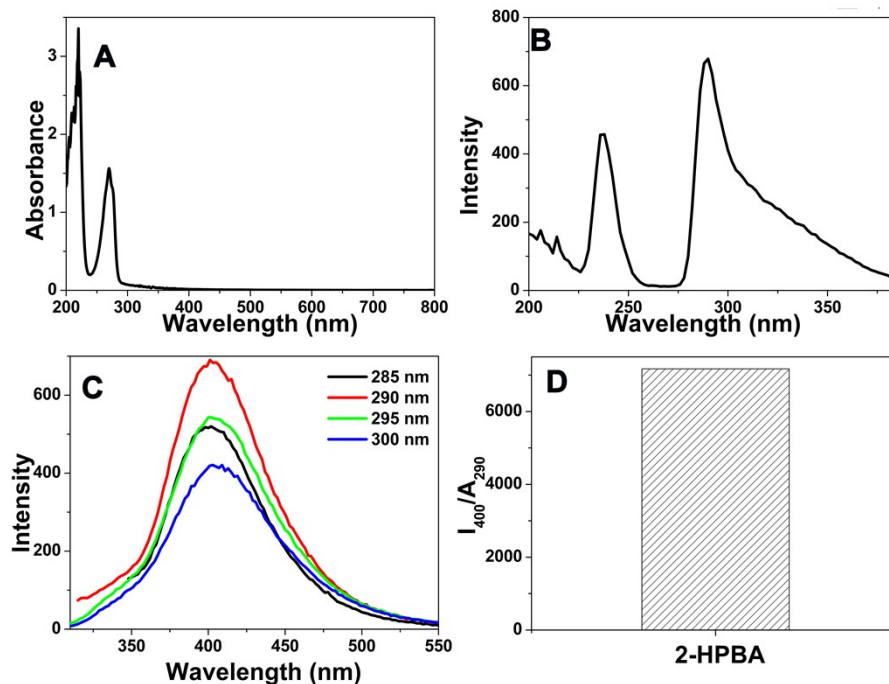

**Fig. S5** (A) UV-vis absorption spectrum of CQDs synthesized from 2-HPBA. (B) Excitation spectrum of CQDs synthesized from 2-HPBA. (C) Emission spectra of CQDs synthesized from 2-HPBA at different excitation wavelengths. (D) Histogram of  $I_{400}/A_{290}$  against 2-HPBA.

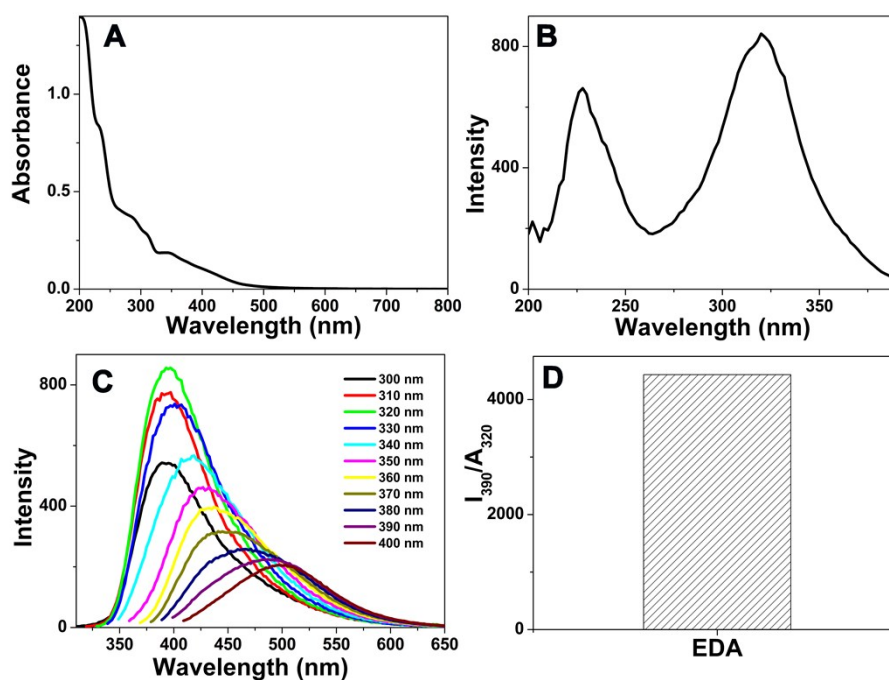

**Fig. S6** (A) UV-vis absorption spectrum of CQDs synthesized from EDA. (B) Excitation spectrum of CQDs synthesized from EDA. (C) Emission spectra of CQDs synthesized from EDA at different excitation wavelengths. (D) Histogram of  $I_{400}/A_{290}$  against EDA.

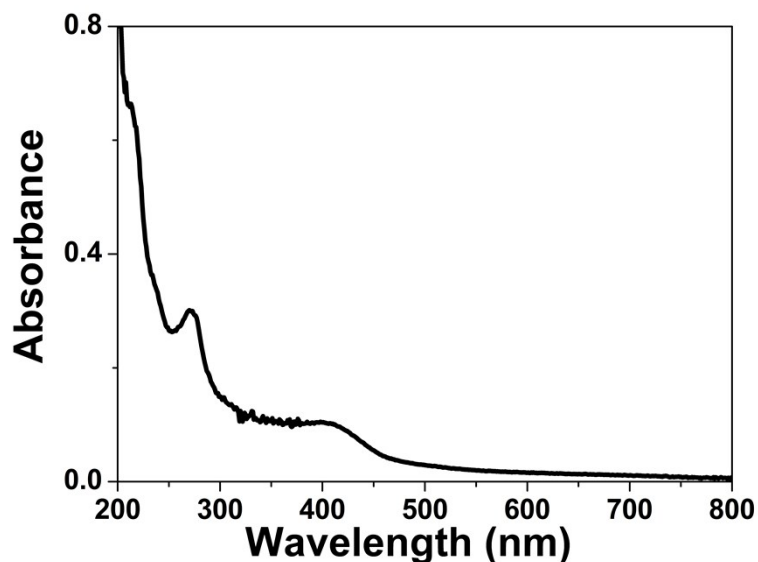

**Fig. S7** UV-vis absorption spectrum of purified NB-CQDs.

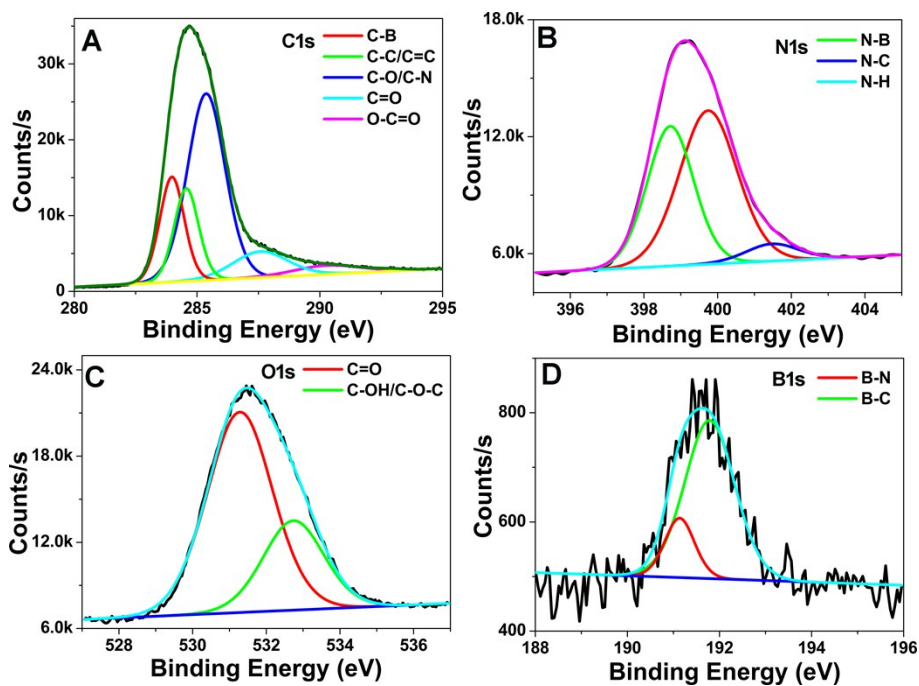

**Fig. S8** High resolution C1s XPS spectrum (A), N1s XPS spectrum (B), O1s XPS spectrum (C) and B1s XPS spectrum (D) of the as-prepared NB-CQDs.

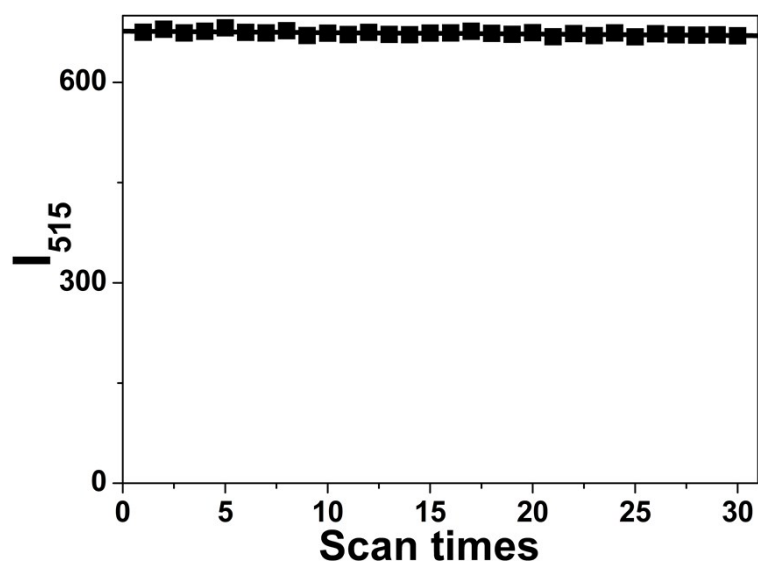

**Fig. S9** The effect of scan time on the fluorescent intensity of NB-CQDs.

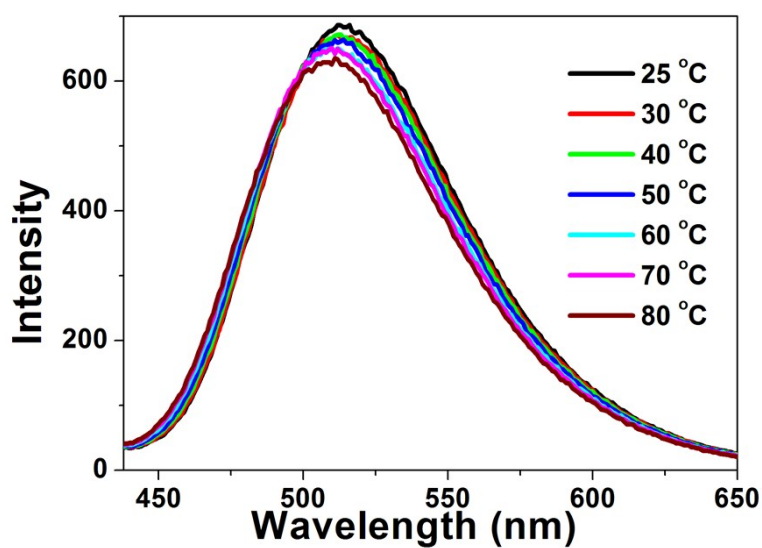

**Fig. S10** The effect of temperature on the fluorescent intensity of NB-CQDs.

**Table S1** Comparison of the performance of the presented method with some other reported nanosensors for Cr(VI) detection.

| Probes                            | Readout      | LOD         | Linear range      | References |
|-----------------------------------|--------------|-------------|-------------------|------------|
| Carbon dots                       | Fluorescence | 15 nM       | 0.05-10.0 $\mu$ M | 1          |
| Fluorescent copper nanoclusters   | Fluorescence | 43 nM       | 0.2-60 $\mu$ M    | 2          |
| Fluorescent silicon nanoparticles | Fluorescence | 28 nM       | 0.1-200 $\mu$ M   | 3          |
| Gallic acid capped                | UV           | 0.1 $\mu$ M | 0.15-21 $\mu$ M   | 4          |

|                                                                                                    |              |             |                  |           |
|----------------------------------------------------------------------------------------------------|--------------|-------------|------------------|-----------|
| gold nanoparticles<br><i>meso</i> -2,3-<br>dimercaptosuccinic<br>acid capped gold<br>nanoparticles | UV           | 10 nM       | 0.01-0.5 $\mu$ M | 5         |
| NB-CQDs                                                                                            | Fluorescence | 0.5 $\mu$ M | 0-250 $\mu$ M    | This work |

**Table S2** Results of NB-CQDs for the detection of Cr(VI) in tap water and lake water.

| Samples    | Added ( $\mu$ M) | Found ( $\mu$ M) | Recovery(%) | RSD(%) |
|------------|------------------|------------------|-------------|--------|
| Tap water  | 0                | 0                | -           | -      |
|            | 60.0             | 68.03            | 113.4       | 2.96   |
|            | 80.0             | 83.13            | 103.9       | 4.38   |
| Lake water | 0                | 0                | -           | -      |
|            | 60.0             | 61.22            | 102.0       | 4.98   |
|            | 80.0             | 82.11            | 102.6       | 3.43   |

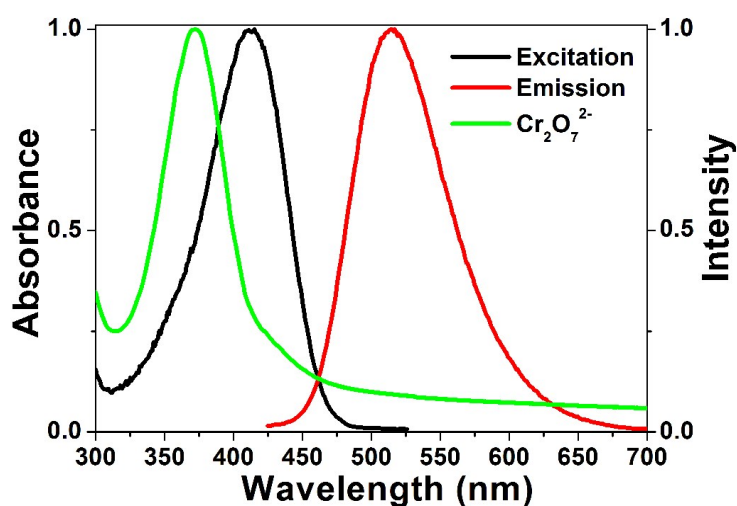

**Fig. S11** UV-vis absorption spectrum of  $K_2Cr_2O_7$  (100  $\mu$ M), excitation spectrum of NB-CQDs and emission spectrum of NB-CQDs (excitation wavelength is 410 nm).

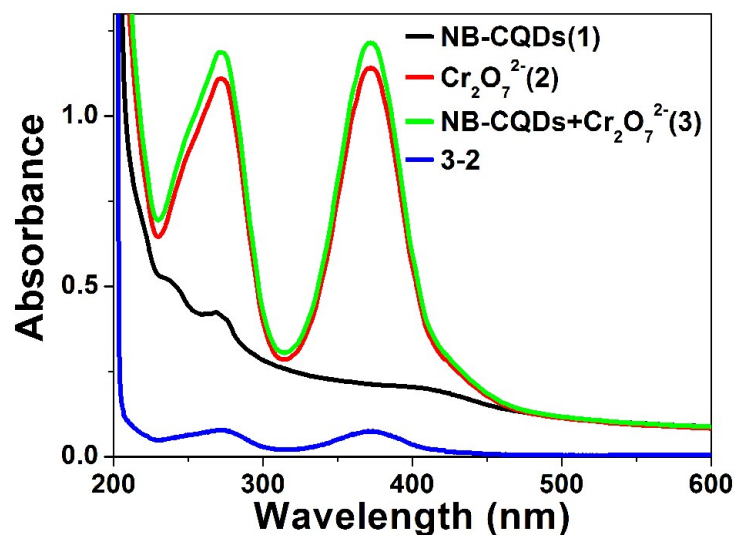

**Fig. S12** UV-vis absorption spectra of NB-CQDs (1), 100  $\mu\text{M}$   $\text{K}_2\text{Cr}_2\text{O}_7$  (2), the mixture of NB-CQDs and 100  $\mu\text{M}$   $\text{K}_2\text{Cr}_2\text{O}_7$  (3), and the blue curve was obtained by subtracting curve 2 from curve 3.

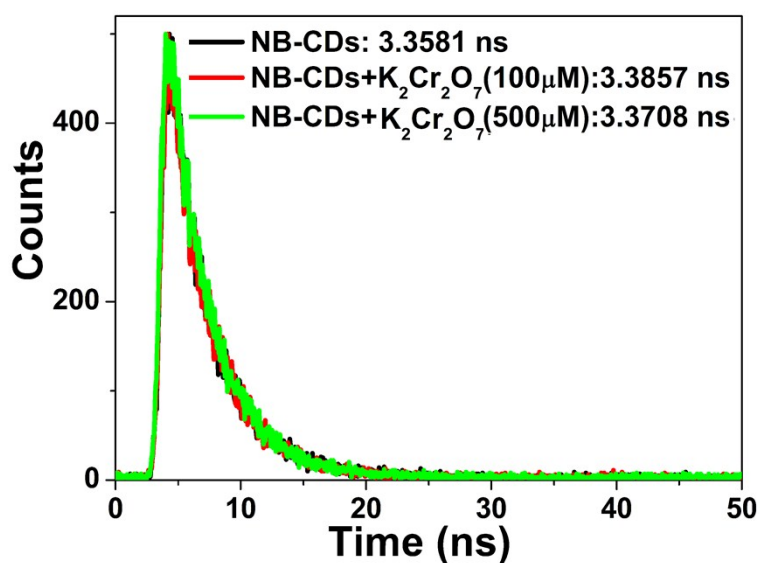

**Fig. S13** Fluorescence decay spectra of NB-CQDs in the absence and presence of  $\text{K}_2\text{Cr}_2\text{O}_7$  (100  $\mu\text{M}$  and 500  $\mu\text{M}$ ).



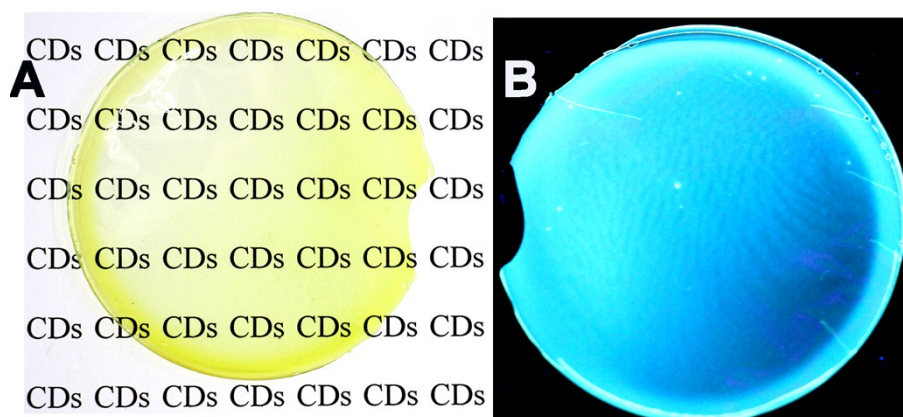

**Fig. S14** Picture of NB-CQDs/PVA film in visible light (A) and 365 nm UV light (B).

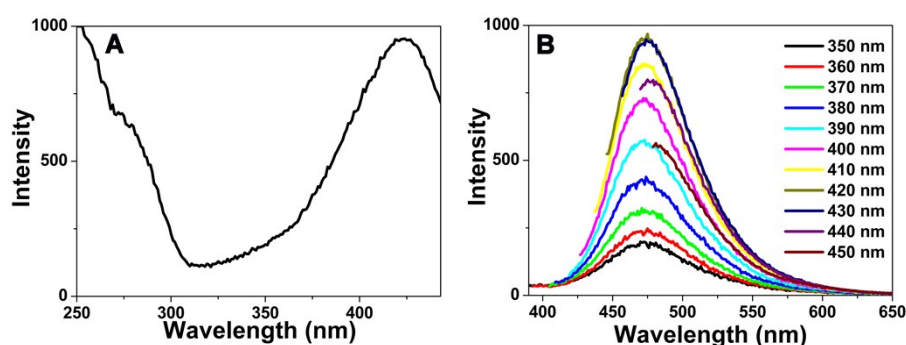

**Fig. S15** (A) Excitation spectrum of NB-CQDs in PVA film. (B) Emission spectra of NB-CQDs in PVA film at different excitation wavelengths.

**References:**

1. X. Liu, T. Li, Q. Wu, X. Yan, C. Wu, X. Chen and G. Zhang, *Talanta*, 2017, **165**, 216-222.
2. M. Cui, G. Song, C. Wang and Q. Song, *Microchimica Acta*, 2015, **182**, 1371-1377.
3. L. Zhu, X. Peng, H. Li, Y. Zhang and S. Yao, *Sensors & Actuators B Chemical*, 2017, **238**, 196-203.
4. C. Dong, G. Wu, Z. Wang, W. Ren, Y. Zhang, Z. Shen, T. Li and A. Wu, *Dalton Transactions*, 2016, **45**, 8347-8354.
5. W. Chen, F. Cao, W. Zheng, Y. Tian, Y. Xianyu, P. Xu, W. Zhang, Z. Wang, K. Deng and X. Jiang, *Nanoscale*, 2015, **7**, 2042-2049.
